# Supplementary material for: Exposure of Zero-Dose Children to Multiple Deprivation: Analyses of Data from 80 Low- and Middle-Income Countries
Source: MDPI journal article supplement (doi:10.3390/vaccines10091568), 2022-09-19
Supplement: s1 [file s1]

## Supplementary material

### Section A

#### Sample weight adjustments for population 12-23 months

In order to take into consideration the number of children aged 12-23 months living in each country, individual sample weights were adjusted using the following equation:

$$w_{ij,adj} = \left( \frac{w_{ij}}{\sum_i w_{ij}} \right) \left( \frac{pop_j}{\sum_j pop_j} \right) N$$

where:

$i$  indicates a child and  $j$  a country

$w_{ij,adj}$  is the adjusted individual sample weight

$w_{ij}$  is the original sample weight

$pop_j$  is the population of children aged 12-23 months in the country  $j$

$N$  is the total number of children in the sample

## Section B

**Table S1.** Number of children with information on DPT and each multiple deprivation indicator for each survey included in the analysis at individual level.

| Country                   | Year | Source | Stunting | Wasting | Lack of improved water | Lack of improved sanitation | Lack of LLIN | Mother without education | Mother without mDFPS |
|---------------------------|------|--------|----------|---------|------------------------|-----------------------------|--------------|--------------------------|----------------------|
| Algeria                   | 2018 | MICS   | 2780     | 2793    | 2953                   | 2953                        | -            | 2953                     | 2436                 |
| Angola                    | 2015 | DHS    | 1369     | 1374    | 2845                   | 2845                        | 2845         | 2845                     | 1285                 |
| Armenia                   | 2015 | DHS    | 318      | 317     | 345                    | 345                         | -            | 345                      | 297                  |
| Bangladesh                | 2017 | DHS    | 1599     | 1607    | 1666                   | 1666                        | -            | 1666                     | 1549                 |
| Belize                    | 2015 | MICS   | 478      | 476     | 503                    | 503                         | -            | 498                      | 382                  |
| Benin                     | 2017 | DHS    | 2465     | 2466    | 2522                   | 2522                        | 2522         | 2522                     | 1632                 |
| Bosnia and Herzegovina    | 2011 | MICS   | 477      | 464     | 516                    | 516                         | -            | 516                      | 412                  |
| Burkina Faso              | 2010 | DHS    | 1368     | 1356    | 2791                   | 2791                        | 2791         | 2791                     | 1670                 |
| Burundi                   | 2016 | DHS    | 1274     | 1278    | 2596                   | 2596                        | 2596         | 2596                     | 1696                 |
| CAR                       | 2018 | MICS   | 1644     | 1653    | 1688                   | 1688                        | 1688         | 1688                     | 882                  |
| Cambodia                  | 2014 | DHS    | 933      | 935     | 1441                   | 1441                        | -            | 1441                     | 1230                 |
| Cameroon                  | 2018 | DHS    | 926      | 924     | 1824                   | 1824                        | 1824         | 1824                     | 918                  |
| Chad                      | 2014 | DHS    | 1811     | 1826    | 2880                   | 2880                        | 1917         | 2880                     | 1079                 |
| Comoros                   | 2012 | DHS    | 532      | 533     | 630                    | 630                         | 630          | 629                      | 448                  |
| Congo Brazzaville         | 2014 | MICS   | 1686     | 1703    | 1773                   | 1773                        | 1773         | 1772                     | 861                  |
| Congo Democratic Republic | 2017 | MICS   | 4138     | 4190    | 4251                   | 4251                        | 4251         | 4250                     | 2133                 |
| Costa Rica                | 2018 | MICS   | 635      | 633     | 708                    | 708                         | -            | 708                      | 445                  |
| Côte d'Ivoire             | 2016 | MICS   | 1768     | 1774    | 1784                   | 1784                        | 1784         | 1784                     | 934                  |
| Cuba                      | 2019 | MICS   | 1118     | 1116    | 1119                   | 1119                        | -            | 1119                     | 771                  |
| Egypt                     | 2014 | DHS    | 3047     | 3032    | 3204                   | 3204                        | -            | 3204                     | 2426                 |
| El Salvador               | 2014 | MICS   | 1485     | 1482    | 1504                   | 1504                        | -            | 1504                     | 1053                 |
| Eswatini                  | 2014 | MICS   | 531      | 531     | 540                    | 540                         | -            | 540                      | 221                  |
| Gabon                     | 2012 | DHS    | 745      | 750     | 1197                   | 1197                        | 1197         | 1197                     | 690                  |
| Gambia                    | 2018 | MICS   | 1870     | 1871    | 1895                   | 1895                        | 1895         | 1890                     | 1151                 |
| Ghana                     | 2017 | MICS   | 1665     | 1664    | 1681                   | 1681                        | 1681         | 1681                     | 1095                 |

|                 |      |      |       |       |       |       |      |       |       |
|-----------------|------|------|-------|-------|-------|-------|------|-------|-------|
| Guatemala       | 2014 | DHS  | 2354  | 2360  | 2408  | 2408  | -    | 2408  | 1823  |
| Guinea          | 2018 | DHS  | 716   | 706   | 1408  | 1408  | 1408 | 1408  | 680   |
| Guinea Bissau   | 2018 | MICS | 1392  | 1398  | 1409  | 1409  | 1409 | 1407  | 625   |
| Guyana          | 2014 | MICS | 619   | 617   | 688   | 688   | -    | 687   | 512   |
| Haiti           | 2016 | DHS  | 1132  | 1126  | 1196  | 1196  | 1196 | 1196  | 964   |
| Honduras        | 2011 | DHS  | 2172  | 2172  | 2277  | 2277  | -    | 2277  | 1725  |
| India           | 2015 | DHS  | 46593 | 46410 | 49284 | 49284 | -    | 49284 | 35260 |
| Iraq            | 2018 | MICS | 3159  | 3161  | 3205  | 3205  | -    | 3205  | 2394  |
| Kazakhstan      | 2015 | MICS | 1053  | 1061  | 1103  | 1103  | -    | 1103  | 789   |
| Kenya           | 2014 | DHS  | 3871  | 3884  | 4052  | 4052  | 4051 | 4052  | 1365  |
| Kiribati        | 2018 | MICS | 447   | 446   | 453   | 453   | -    | 452   | 284   |
| Kosovo          | 2019 | MICS | 214   | 215   | 294   | 294   | -    | 294   | 228   |
| Kyrgyzstan      | 2018 | MICS | 623   | 624   | 643   | 643   | -    | 643   | 410   |
| Lao             | 2017 | MICS | 2140  | 2162  | 2215  | 2215  | 2215 | 2215  | 1641  |
| Lesotho         | 2018 | MICS | 649   | 649   | 667   | 667   | -    | 667   | 426   |
| Liberia         | 2019 | DHS  | 517   | 520   | 1063  | 1063  | 1063 | 1063  | 593   |
| Madagascar      | 2018 | MICS | 2521  | 2528  | 2590  | 2590  | 2590 | 2590  | 1490  |
| Malawi          | 2015 | DHS  | 1055  | 1067  | 3248  | 3248  | 3248 | 3248  | 2507  |
| Maldives        | 2016 | DHS  | 471   | 470   | 590   | 590   | -    | 590   | 504   |
| Mali            | 2018 | DHS  | 1821  | 1827  | 1946  | 1946  | 1946 | 1946  | 1072  |
| Mauritania      | 2015 | MICS | 2020  | 2020  | 2131  | 2131  | 2131 | 2126  | 1374  |
| Mexico          | 2015 | MICS | 1501  | 1495  | 1536  | 1536  | -    | 1534  | 1099  |
| Moldova         | 2012 | MICS | 345   | 343   | 386   | 386   | -    | 386   | 283   |
| Mongolia        | 2018 | MICS | 1054  | 1049  | 1077  | 1077  | -    | 1077  | 781   |
| Montenegro      | 2013 | MICS | 252   | 251   | 266   | 266   | -    | 266   | 162   |
| Myanmar         | 2015 | DHS  | 850   | 845   | 915   | 915   | 915  | 915   | 734   |
| Namibia         | 2013 | DHS  | 406   | 400   | 991   | 991   | 991  | 991   | 409   |
| Nepal           | 2019 | MICS | 1247  | 1296  | 1327  | 1327  | -    | 1325  | 1149  |
| Niger           | 2012 | DHS  | 902   | 907   | 2151  | 2151  | 2151 | 2146  | 1117  |
| Nigeria         | 2018 | DHS  | 2391  | 2400  | 6059  | 6059  | 6059 | 6059  | 2766  |
| North Macedonia | 2018 | MICS | 247   | 247   | 307   | 307   | -    | 307   | 243   |

|                       |      |      |      |      |      |      |      |      |      |
|-----------------------|------|------|------|------|------|------|------|------|------|
| Pakistan              | 2017 | DHS  | 674  | 678  | 1893 | 1893 | 1891 | 1893 | 1278 |
| Papua New Guinea      | 2016 | DHS  | 670  | 663  | 1816 | 1816 | 1816 | 1816 | 1371 |
| Paraguay              | 2016 | MICS | 974  | 977  | 1012 | 1012 | -    | 1012 | 721  |
| Rwanda                | 2014 | DHS  | 732  | 734  | 1537 | 1537 | 1537 | 1537 | 1095 |
| São Tomé and Príncipe | 2019 | MICS | 343  | 341  | 349  | 349  | 349  | 348  | 223  |
| Senegal               | 2019 | DHS  | 1142 | 1137 | 1183 | 1183 | 1183 | 1183 | 796  |
| Serbia                | 2019 | MICS | 236  | 235  | 384  | 384  | -    | 384  | 272  |
| Sierra Leone          | 2019 | DHS  | 873  | 877  | 1861 | 1861 | 1861 | 1861 | 1032 |
| South Africa          | 2016 | DHS  | 225  | 208  | 670  | 670  | -    | 670  | 248  |
| State of Palestine    | 2019 | MICS | 1205 | 1197 | 1330 | 1330 | -    | 1330 | 953  |
| Sudan                 | 2014 | MICS | 2396 | 2384 | 2641 | 2641 | -    | 2638 | 1331 |
| Suriname              | 2018 | MICS | 634  | 637  | 763  | 763  | -    | 751  | 505  |
| Tajikistan            | 2017 | DHS  | 1267 | 1263 | 1297 | 1297 | -    | 1297 | 776  |
| Tanzania              | 2015 | DHS  | 2075 | 2080 | 2158 | 2158 | 2158 | 2158 | 1419 |
| Thailand              | 2019 | MICS | 2638 | 2631 | 2879 | 2879 | -    | 2879 | 1790 |
| Timor-Leste           | 2016 | DHS  | 1229 | 1220 | 1423 | 1423 | 1423 | 1423 | 895  |
| Togo                  | 2017 | MICS | 969  | 968  | 973  | 973  | 973  | 973  | 682  |
| Tonga                 | 2019 | MICS | 231  | 230  | 246  | 246  | -    | 245  | 122  |
| Tunisia               | 2018 | MICS | 632  | 635  | 656  | 656  | -    | 656  | 561  |
| Turkey                | 2013 | DHS  | 584  | 579  | 764  | 764  | -    | 764  | 680  |
| Turkmenistan          | 2015 | MICS | 772  | 773  | 787  | 787  | -    | 787  | 528  |
| Uganda                | 2016 | DHS  | 932  | 931  | 2922 | 2922 | 2922 | 2922 | 2009 |
| Yemen                 | 2013 | DHS  | 2801 | 2818 | 3053 | 3053 | -    | 3053 | 2499 |
| Zambia                | 2018 | DHS  | 1840 | 1849 | 1928 | 1928 | 1928 | 1928 | 1335 |

Legend: DPT: Diphtheria, Pertussis, Tetanus. LLIN: long-lasting insecticidal nets. mDFPS: demand for family planning satisfied with modern methods.

**Table S2.** Surveys included in ecological analysis.

| Country                   | Year | Source | No-DPT children | Stunted children | Wasted children | Household members without improved water | Household members without improved sanitation | Household members without LLIN | Mother without education | Women without mDFPS |
|---------------------------|------|--------|-----------------|------------------|-----------------|------------------------------------------|-----------------------------------------------|--------------------------------|--------------------------|---------------------|
| Algeria                   | 2018 | MICS   | 2953            | 2780             | 2793            | 29919                                    | 29919                                         | -                              | 14873                    | 11718               |
| Angola                    | 2015 | DHS    | 2845            | 1369             | 1374            | 16072                                    | 16072                                         | 16072                          | 14322                    | 3849                |
| Armenia                   | 2015 | DHS    | 345             | 318              | 317             | 7893                                     | 7893                                          | -                              | 1724                     | 2761                |
| Bangladesh                | 2017 | DHS    | 1666            | 1599             | 1607            | 19457                                    | 19457                                         | -                              | 8759                     | 13986               |
| Belize                    | 2015 | MICS   | 503             | 478              | 476             | 4636                                     | 4636                                          | -                              | 2515                     | 2344                |
| Benin                     | 2017 | DHS    | 2522            | 2465             | 2466            | 14156                                    | 14156                                         | 14156                          | 13589                    | 5350                |
| Bosnia and Herzegovina    | 2011 | MICS   | 516             | 477              | 464             | 5778                                     | 5778                                          | -                              | 2297                     | 2013                |
| Burkina Faso              | 2010 | DHS    | 2791            | 1391             | 1379            | 14415                                    | 14415                                         | 14415                          | 15039                    | 5445                |
| Burundi                   | 2016 | DHS    | 2596            | 1274             | 1278            | 15976                                    | 15976                                         | 15976                          | 13192                    | 5572                |
| Cambodia                  | 2014 | DHS    | 1441            | 1062             | 1065            | 15821                                    | 15821                                         | -                              | 7165                     | 7926                |
| Cameroon                  | 2018 | DHS    | 1824            | 926              | 924             | 11693                                    | 11693                                         | 11693                          | 9733                     | 3323                |
| CAR                       | 2018 | MICS   | 1688            | 1644             | 1653            | 8133                                     | 8133                                          | 8133                           | 8921                     | 3144                |
| Chad                      | 2014 | DHS    | 2880            | 1880             | 1899            | 17229                                    | 17229                                         | 11380                          | 18623                    | 3612                |
| Comoros                   | 2012 | DHS    | 630             | 586              | 586             | 4474                                     | 4474                                          | 4474                           | 3138                     | 1723                |
| Congo Brazzaville         | 2014 | MICS   | 1773            | 1686             | 1703            | 12811                                    | 12811                                         | 12811                          | 9167                     | 3293                |
| Congo Democratic Republic | 2017 | MICS   | 4251            | 4138             | 4190            | 20792                                    | 20792                                         | 20792                          | 21455                    | 6431                |
| Costa Rica                | 2018 | MICS   | 708             | 635              | 633             | 8490                                     | 8490                                          | -                              | 3612                     | 3444                |
| Côte d'Ivoire             | 2016 | MICS   | 1784            | 1768             | 1774            | 11879                                    | 11879                                         | 11879                          | 9094                     | 3227                |
| Cuba                      | 2019 | MICS   | 1119            | 1118             | 1116            | 11966                                    | 11966                                         | -                              | 5254                     | 4823                |
| Egypt                     | 2014 | DHS    | 3204            | 3077             | 3057            | 28162                                    | 28162                                         | -                              | 15848                    | 14288               |
| El Salvador               | 2014 | MICS   | 1504            | 1485             | 1482            | 12507                                    | 12507                                         | -                              | 7339                     | 6390                |
| Eswatini                  | 2014 | MICS   | 540             | 531              | 531             | 4865                                     | 4865                                          | -                              | 2688                     | 1453                |
| Gabon                     | 2012 | DHS    | 1197            | 864              | 868             | 9733                                     | 9733                                          | 9733                           | 6067                     | 2687                |
| Gambia                    | 2018 | MICS   | 1895            | 1870             | 1871            | 7405                                     | 7405                                          | 7405                           | 9891                     | 3891                |

| Country       | Year | Source | No-DPT<br>children | Stunted<br>children | Wasted<br>children | Household<br>members<br>without<br>improved<br>water | Household<br>members<br>without<br>improved<br>sanitation | Household<br>members<br>without<br>LLIN | Mother<br>without<br>education | Women<br>without<br>mDFPS |
|---------------|------|--------|--------------------|---------------------|--------------------|------------------------------------------------------|-----------------------------------------------------------|-----------------------------------------|--------------------------------|---------------------------|
| Ghana         | 2017 | MICS   | 1681               | 1665                | 1664               | 12886                                                | 12886                                                     | 12886                                   | 8879                           | 4552                      |
| Guatemala     | 2014 | DHS    | 2408               | 2428                | 2434               | 21373                                                | 21373                                                     | -                                       | 12440                          | 11116                     |
| Guinea        | 2018 | DHS    | 1408               | 716                 | 706                | 7912                                                 | 7912                                                      | 7912                                    | 7951                           | 2510                      |
| Guinea Bissau | 2018 | MICS   | 1409               | 1392                | 1398               | 7379                                                 | 7379                                                      | 7379                                    | 7482                           | 2524                      |
| Guyana        | 2014 | MICS   | 688                | 619                 | 617                | 5077                                                 | 5077                                                      | -                                       | 3353                           | 2648                      |
| Haiti         | 2016 | DHS    | 1196               | 1132                | 1126               | 13405                                                | 13405                                                     | 13405                                   | 6530                           | 5511                      |
| Honduras      | 2011 | DHS    | 2277               | 2323                | 2323               | 21349                                                | 21349                                                     | -                                       | 10888                          | 10925                     |
| India         | 2015 | DHS    | 49284              | 47722               | 47538              | 601137                                               | 601137                                                    | -                                       | 259627                         | 323291                    |
| Iraq          | 2018 | MICS   | 3205               | 3159                | 3161               | 20214                                                | 20214                                                     | -                                       | 16623                          | 11859                     |
| Kazakhstan    | 2015 | MICS   | 1103               | 1053                | 1061               | 16500                                                | 16500                                                     | -                                       | 5510                           | 5107                      |
| Kenya         | 2014 | DHS    | 4052               | 4112                | 4128               | 36405                                                | 36405                                                     | 36402                                   | 20964                          | 6450                      |
| Kiribati      | 2018 | MICS   | 453                | 447                 | 446                | 3071                                                 | 3071                                                      | -                                       | 2175                           | 1462                      |
| Kosovo        | 2019 | MICS   | 294                | 214                 | 215                | 5124                                                 | 5124                                                      | -                                       | 1539                           | 2065                      |
| Kyrgyzstan    | 2018 | MICS   | 643                | 623                 | 624                | 6968                                                 | 6968                                                      | -                                       | 3546                           | 2238                      |
| Lao           | 2017 | MICS   | 2215               | 2140                | 2162               | 22287                                                | 22287                                                     | 22287                                   | 11719                          | 12479                     |
| Lesotho       | 2018 | MICS   | 667                | 649                 | 649                | 8847                                                 | 8847                                                      | -                                       | 3256                           | 2652                      |
| Liberia       | 2019 | DHS    | 1063               | 517                 | 520                | 9062                                                 | 9062                                                      | 9062                                    | 5704                           | 2787                      |
| Madagascar    | 2018 | MICS   | 2590               | 2521                | 2528               | 17870                                                | 17870                                                     | 17870                                   | 12851                          | 6315                      |
| Malawi        | 2015 | DHS    | 3248               | 1055                | 1067               | 26337                                                | 26337                                                     | 26337                                   | 17286                          | 12436                     |
| Maldives      | 2016 | DHS    | 590                | 471                 | 470                | 6044                                                 | 6044                                                      | -                                       | 3106                           | 2915                      |
| Mali          | 2018 | DHS    | 1946               | 1821                | 1827               | 9507                                                 | 9507                                                      | 9507                                    | 9940                           | 3186                      |
| Mauritania    | 2015 | MICS   | 2131               | 2020                | 2020               | 11765                                                | 11765                                                     | 11765                                   | 10641                          | 4662                      |
| Mexico        | 2015 | MICS   | 1536               | 1501                | 1495               | 10760                                                | 10760                                                     | -                                       | 8063                           | 6397                      |
| Moldova       | 2012 | MICS   | 386                | 345                 | 343                | 11354                                                | 11354                                                     | -                                       | 1869                           | 2519                      |
| Mongolia      | 2018 | MICS   | 1077               | 1054                | 1049               | 13798                                                | 13798                                                     | -                                       | 6091                           | 5112                      |
| Montenegro    | 2013 | MICS   | 266                | 252                 | 251                | 4052                                                 | 4052                                                      | -                                       | 1420                           | 911                       |

| Country               | Year | Source | No-DPT<br>children | Stunted<br>children | Wasted<br>children | Household<br>members<br>without<br>improved<br>water | Household<br>members<br>without<br>improved<br>sanitation | Household<br>members<br>without<br>LLIN | Mother<br>without<br>education | Women<br>without<br>mDFPS |
|-----------------------|------|--------|--------------------|---------------------|--------------------|------------------------------------------------------|-----------------------------------------------------------|-----------------------------------------|--------------------------------|---------------------------|
| Myanmar               | 2015 | DHS    | 915                | 921                 | 915                | 12500                                                | 12500                                                     | 12500                                   | 4815                           | 5213                      |
| Namibia               | 2013 | DHS    | 991                | 532                 | 526                | 9826                                                 | 9826                                                      | 9826                                    | 5046                           | 2510                      |
| Nepal                 | 2019 | MICS   | 1327               | 1247                | 1296               | 12655                                                | 12655                                                     | -                                       | 6655                           | 7870                      |
| Niger                 | 2012 | DHS    | 2151               | 946                 | 956                | 10749                                                | 10749                                                     | 10749                                   | 12537                          | 3113                      |
| Nigeria               | 2018 | DHS    | 6059               | 2391                | 2400               | 40392                                                | 40392                                                     | 40392                                   | 33924                          | 10219                     |
| North Macedonia       | 2018 | MICS   | 307                | 247                 | 247                | 4082                                                 | 4082                                                      | -                                       | 1506                           | 1537                      |
| Pakistan              | 2017 | DHS    | 1893               | 674                 | 678                | 11869                                                | 11869                                                     | 11866                                   | 10473                          | 5996                      |
| Papua New Guinea      | 2016 | DHS    | 1816               | 670                 | 663                | 16021                                                | 16021                                                     | 16012                                   | 9514                           | 6565                      |
| Paraguay              | 2016 | MICS   | 1012               | 974                 | 977                | 7313                                                 | 7313                                                      | -                                       | 4625                           | 3757                      |
| Rwanda                | 2014 | DHS    | 1537               | 761                 | 765                | 12698                                                | 12698                                                     | 12698                                   | 7856                           | 4980                      |
| São Tomé and Príncipe | 2019 | MICS   | 349                | 343                 | 341                | 3426                                                 | 3426                                                      | 3426                                    | 1839                           | 1274                      |
| Senegal               | 2019 | DHS    | 1183               | 1142                | 1137               | 4538                                                 | 4538                                                      | 4538                                    | 6125                           | 2788                      |
| Serbia                | 2019 | MICS   | 384                | 236                 | 235                | 6346                                                 | 6346                                                      | -                                       | 1838                           | 1777                      |
| Sierra Leone          | 2019 | DHS    | 1861               | 873                 | 877                | 13399                                                | 13399                                                     | 13399                                   | 9899                           | 4403                      |
| South Africa          | 2016 | DHS    | 670                | 225                 | 208                | 11066                                                | 11066                                                     | -                                       | 3548                           | 1953                      |
| State of Palestine    | 2019 | MICS   | 1330               | 1205                | 1197               | 9326                                                 | 9326                                                      | -                                       | 6328                           | 4448                      |
| Sudan                 | 2014 | MICS   | 2641               | 2396                | 2384               | 16801                                                | 16801                                                     | -                                       | 14065                          | 4223                      |
| Suriname              | 2018 | MICS   | 763                | 634                 | 637                | 7915                                                 | 7915                                                      | -                                       | 4227                           | 3571                      |
| Tajikistan            | 2017 | DHS    | 1297               | 1267                | 1263               | 7840                                                 | 7840                                                      | -                                       | 6195                           | 3924                      |
| Tanzania              | 2015 | DHS    | 2158               | 2075                | 2080               | 12563                                                | 12563                                                     | 12563                                   | 10233                          | 4802                      |
| Thailand              | 2019 | MICS   | 2879               | 2638                | 2631               | 35604                                                | 35604                                                     | -                                       | 13684                          | 14500                     |
| Timor-Leste           | 2016 | DHS    | 1423               | 1229                | 1220               | 11498                                                | 11498                                                     | 11498                                   | 7221                           | 3818                      |
| Togo                  | 2017 | MICS   | 973                | 969                 | 968                | 7916                                                 | 7916                                                      | 7916                                    | 4941                           | 2630                      |
| Tonga                 | 2019 | MICS   | 246                | 231                 | 230                | 2498                                                 | 2498                                                      | -                                       | 1346                           | 750                       |
| Tunisia               | 2018 | MICS   | 656                | 632                 | 635                | 11225                                                | 11225                                                     | -                                       | 3420                           | 4336                      |
| Turkey                | 2013 | DHS    | 764                | 584                 | 579                | 11794                                                | 11794                                                     | -                                       | 3648                           | 5369                      |

| Country      | Year | Source | No-DPT<br>children | Stunted<br>children | Wasted<br>children | Household<br>members<br>without<br>improved<br>water | Household<br>members<br>without<br>improved<br>sanitation | Household<br>members<br>without<br>LLIN | Mother<br>without<br>education | Women<br>without<br>mDFPS |
|--------------|------|--------|--------------------|---------------------|--------------------|------------------------------------------------------|-----------------------------------------------------------|-----------------------------------------|--------------------------------|---------------------------|
| Turkmenistan | 2015 | MICS   | 787                | 772                 | 773                | 5861                                                 | 5861                                                      | -                                       | 3765                           | 2953                      |
| Uganda       | 2016 | DHS    | 2922               | 932                 | 931                | 19588                                                | 19588                                                     | 19588                                   | 15522                          | 7556                      |
| Yemen        | 2013 | DHS    | 3053               | 2869                | 2886               | 17346                                                | 17346                                                     | -                                       | 16093                          | 9623                      |
| Zambia       | 2018 | DHS    | 1928               | 1840                | 1849               | 12829                                                | 12829                                                     | 12829                                   | 9959                           | 5211                      |

Legend: DPT: Diphtheria, Pertussis, Tetanus. LLIN: long-lasting insecticidal nets. mDFPS: demand for family planning satisfied with modern methods.



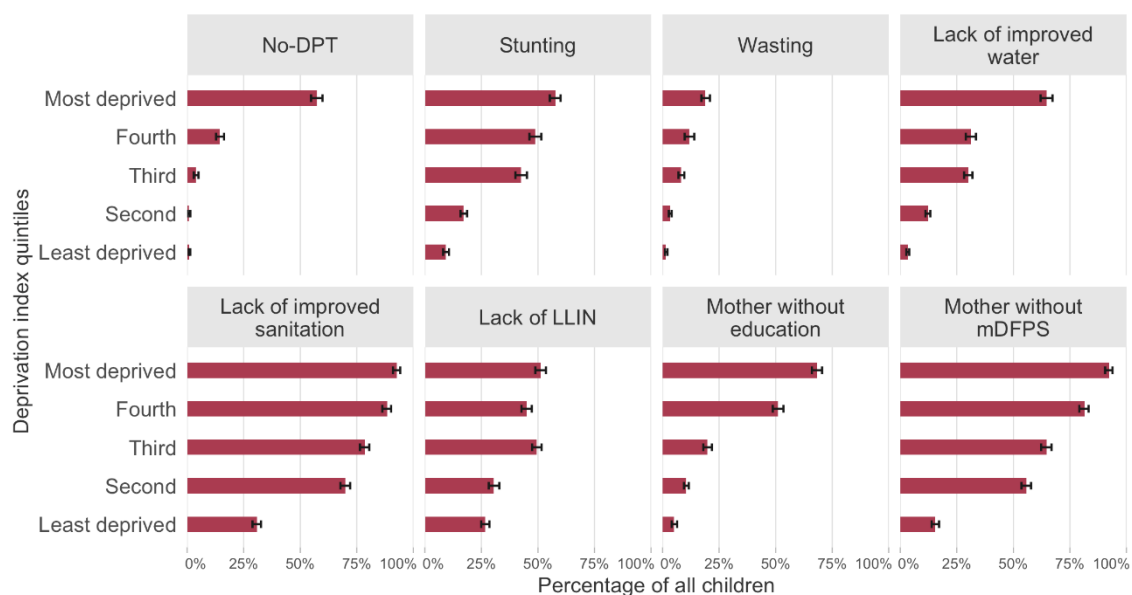

**Figure S1.** Prevalence of each indicator according to deprivation index quintiles (countries with information on LLIN). No-DPT was one of the variables used in the PCA. Legend: DPT: Diphtheria, Pertussis, Tetanus. LLIN: long-lasting insecticidal nets. mDFPS: demand for family planning satisfied with modern methods. PCA: principal component analysis.

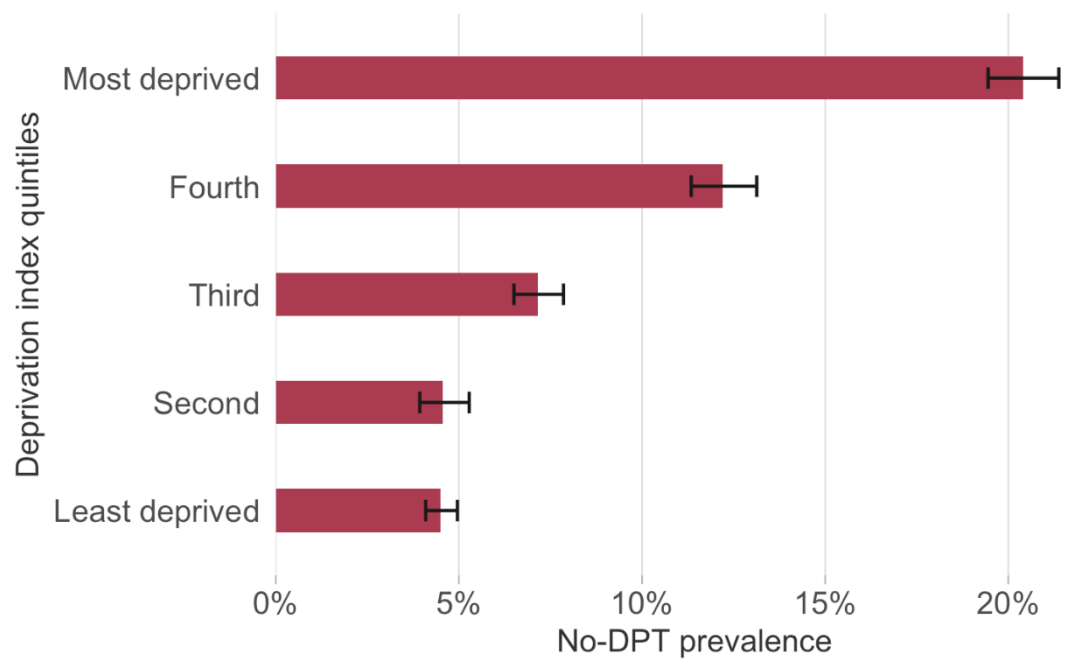

**Figure S2.** Prevalence of no-DPT according to deprivation index quintiles (all countries. No-DPT was not included in the PCA. Legend: DPT: Diphtheria, Pertussis, Tetanus. PCA: principal component analysis.
